# Supplementary material for: Silver nanoparticles can be sampled by ultrafiltration probe but elution into & recovery from plasma and Dulbecco’s Phosphate Buffered Saline differs in vitro
Source: PeerJ journal article supplement (doi:10.7717/peerj.18388), 2024-10-24
Supplement: S2-Ag_verification_08272024_calculated.xlsx [file S2-Ag_verification_08272024_calculated.xlsx]

## Sheet: Raw Intensities
	Sample Id	R	Acquisition Time	QC Status	Dataset File	Method File	Ag 107 (cps)	Y 89 (IS) (cps)
1	wash		8/27/2024 1:25:05 PM		C:\Users\Public\Documents\PerkinElmer Syngistix\ICPMS\DataSet\April2024\wash.847	C:\Users\Public\Documents\PerkinElmer Syngistix\ICPMS\Method\ag10.mth	131.601	791155
2	wash		8/27/2024 1:27:11 PM		C:\Users\Public\Documents\PerkinElmer Syngistix\ICPMS\DataSet\April2024\wash.848	C:\Users\Public\Documents\PerkinElmer Syngistix\ICPMS\Method\ag10.mth	83.4669	781695
3	wash		8/27/2024 1:29:18 PM		C:\Users\Public\Documents\PerkinElmer Syngistix\ICPMS\DataSet\April2024\wash.849	C:\Users\Public\Documents\PerkinElmer Syngistix\ICPMS\Method\ag10.mth	77.2002	774718
4	Blank		8/27/2024 1:31:28 PM		C:\Users\Public\Documents\PerkinElmer Syngistix\ICPMS\DataSet\April2024\Blank.850	C:\Users\Public\Documents\PerkinElmer Syngistix\ICPMS\Method\ag10.mth	72.6669	786811
5	50		8/27/2024 1:33:34 PM		C:\Users\Public\Documents\PerkinElmer Syngistix\ICPMS\DataSet\April2024\50.851	C:\Users\Public\Documents\PerkinElmer Syngistix\ICPMS\Method\ag10.mth	7316.94	777629
6	20		8/27/2024 1:35:41 PM		C:\Users\Public\Documents\PerkinElmer Syngistix\ICPMS\DataSet\April2024\20.852	C:\Users\Public\Documents\PerkinElmer Syngistix\ICPMS\Method\ag10.mth	19556.2	773594
7	5		8/27/2024 1:37:49 PM		C:\Users\Public\Documents\PerkinElmer Syngistix\ICPMS\DataSet\April2024\5.853	C:\Users\Public\Documents\PerkinElmer Syngistix\ICPMS\Method\ag10.mth	82397	778296
8	2		8/27/2024 1:39:55 PM		C:\Users\Public\Documents\PerkinElmer Syngistix\ICPMS\DataSet\April2024\2.854	C:\Users\Public\Documents\PerkinElmer Syngistix\ICPMS\Method\ag10.mth	217660	779214
9	1		8/27/2024 1:42:02 PM		C:\Users\Public\Documents\PerkinElmer Syngistix\ICPMS\DataSet\April2024\1.855	C:\Users\Public\Documents\PerkinElmer Syngistix\ICPMS\Method\ag10.mth	433210	780384
10	Calibration Curves		8/27/2024 1:42:02 PM
11	blank		8/27/2024 1:44:09 PM		C:\Users\Public\Documents\PerkinElmer Syngistix\ICPMS\DataSet\April2024\blank.856	C:\Users\Public\Documents\PerkinElmer Syngistix\ICPMS\Method\ag10.mth	362.805	774525
12	0_10fold		8/27/2024 1:46:57 PM		C:\Users\Public\Documents\PerkinElmer Syngistix\ICPMS\DataSet\April2024\0_10fold.857	C:\Users\Public\Documents\PerkinElmer Syngistix\ICPMS\Method\ag10.mth	221.202	776577
13	0_10fold		8/27/2024 1:49:03 PM		C:\Users\Public\Documents\PerkinElmer Syngistix\ICPMS\DataSet\April2024\0_10fold.858	C:\Users\Public\Documents\PerkinElmer Syngistix\ICPMS\Method\ag10.mth	173.601	775473
14	2_10fold		8/27/2024 1:51:10 PM		C:\Users\Public\Documents\PerkinElmer Syngistix\ICPMS\DataSet\April2024\2_10fold.859	C:\Users\Public\Documents\PerkinElmer Syngistix\ICPMS\Method\ag10.mth	788.422	771228
15	2_10fold		8/27/2024 1:53:16 PM		C:\Users\Public\Documents\PerkinElmer Syngistix\ICPMS\DataSet\April2024\2_10fold.860	C:\Users\Public\Documents\PerkinElmer Syngistix\ICPMS\Method\ag10.mth	875.227	775451
16	4_10fold		8/27/2024 1:55:22 PM		C:\Users\Public\Documents\PerkinElmer Syngistix\ICPMS\DataSet\April2024\4_10fold.861	C:\Users\Public\Documents\PerkinElmer Syngistix\ICPMS\Method\ag10.mth	1847.32	766901
17	4_10fold		8/27/2024 1:57:29 PM		C:\Users\Public\Documents\PerkinElmer Syngistix\ICPMS\DataSet\April2024\4_10fold.862	C:\Users\Public\Documents\PerkinElmer Syngistix\ICPMS\Method\ag10.mth	1716.24	770339
18	20_10fold		8/27/2024 1:59:35 PM		C:\Users\Public\Documents\PerkinElmer Syngistix\ICPMS\DataSet\April2024\20_10fold.863	C:\Users\Public\Documents\PerkinElmer Syngistix\ICPMS\Method\ag10.mth	7177.27	765630
19	20_10fold		8/27/2024 2:01:40 PM		C:\Users\Public\Documents\PerkinElmer Syngistix\ICPMS\DataSet\April2024\20_10fold.864	C:\Users\Public\Documents\PerkinElmer Syngistix\ICPMS\Method\ag10.mth	8931.99	778555
20	40_10fold		8/27/2024 2:03:46 PM		C:\Users\Public\Documents\PerkinElmer Syngistix\ICPMS\DataSet\April2024\40_10fold.865	C:\Users\Public\Documents\PerkinElmer Syngistix\ICPMS\Method\ag10.mth	14159.8	779233
21	40_10fold		8/27/2024 2:05:52 PM		C:\Users\Public\Documents\PerkinElmer Syngistix\ICPMS\DataSet\April2024\40_10fold.866	C:\Users\Public\Documents\PerkinElmer Syngistix\ICPMS\Method\ag10.mth	14711	775631
22	100_10fold		8/27/2024 2:07:58 PM		C:\Users\Public\Documents\PerkinElmer Syngistix\ICPMS\DataSet\April2024\100_10fold.867	C:\Users\Public\Documents\PerkinElmer Syngistix\ICPMS\Method\ag10.mth	34702.6	770545
23	100_10fold		8/27/2024 2:10:03 PM		C:\Users\Public\Documents\PerkinElmer Syngistix\ICPMS\DataSet\April2024\100_10fold.868	C:\Users\Public\Documents\PerkinElmer Syngistix\ICPMS\Method\ag10.mth	34157.9	769131
24	stock_100fold		8/27/2024 2:12:10 PM		C:\Users\Public\Documents\PerkinElmer Syngistix\ICPMS\DataSet\April2024\stock_100fold.869	C:\Users\Public\Documents\PerkinElmer Syngistix\ICPMS\Method\ag10.mth	47721.6	727251

## Sheet: Raw Intensities RSDs
	Sample Id	R	Acquisition Time	QC Status	Dataset File	Method File	Ag 107	Y 89 (IS)
1	wash		8/27/2024 1:25:05 PM		C:\Users\Public\Documents\PerkinElmer Syngistix\ICPMS\DataSet\April2024\wash.847	C:\Users\Public\Documents\PerkinElmer Syngistix\ICPMS\Method\ag10.mth	0.137369	0.00529663
2	wash		8/27/2024 1:27:11 PM		C:\Users\Public\Documents\PerkinElmer Syngistix\ICPMS\DataSet\April2024\wash.848	C:\Users\Public\Documents\PerkinElmer Syngistix\ICPMS\Method\ag10.mth	0.0719739	0.00430339
3	wash		8/27/2024 1:29:18 PM		C:\Users\Public\Documents\PerkinElmer Syngistix\ICPMS\DataSet\April2024\wash.849	C:\Users\Public\Documents\PerkinElmer Syngistix\ICPMS\Method\ag10.mth	0.127122	0.00869352
4	Blank		8/27/2024 1:31:28 PM		C:\Users\Public\Documents\PerkinElmer Syngistix\ICPMS\DataSet\April2024\Blank.850	C:\Users\Public\Documents\PerkinElmer Syngistix\ICPMS\Method\ag10.mth	0.110283	0.0088386
5	50		8/27/2024 1:33:34 PM		C:\Users\Public\Documents\PerkinElmer Syngistix\ICPMS\DataSet\April2024\50.851	C:\Users\Public\Documents\PerkinElmer Syngistix\ICPMS\Method\ag10.mth	0.011841	0.0137795
6	20		8/27/2024 1:35:41 PM		C:\Users\Public\Documents\PerkinElmer Syngistix\ICPMS\DataSet\April2024\20.852	C:\Users\Public\Documents\PerkinElmer Syngistix\ICPMS\Method\ag10.mth	0.00473006	0.00446737
7	5		8/27/2024 1:37:49 PM		C:\Users\Public\Documents\PerkinElmer Syngistix\ICPMS\DataSet\April2024\5.853	C:\Users\Public\Documents\PerkinElmer Syngistix\ICPMS\Method\ag10.mth	0.0106337	0.00595813
8	2		8/27/2024 1:39:55 PM		C:\Users\Public\Documents\PerkinElmer Syngistix\ICPMS\DataSet\April2024\2.854	C:\Users\Public\Documents\PerkinElmer Syngistix\ICPMS\Method\ag10.mth	0.00768236	0.00463357
9	1		8/27/2024 1:42:02 PM		C:\Users\Public\Documents\PerkinElmer Syngistix\ICPMS\DataSet\April2024\1.855	C:\Users\Public\Documents\PerkinElmer Syngistix\ICPMS\Method\ag10.mth	0.00390507	0.00244325
11	blank		8/27/2024 1:44:09 PM		C:\Users\Public\Documents\PerkinElmer Syngistix\ICPMS\DataSet\April2024\blank.856	C:\Users\Public\Documents\PerkinElmer Syngistix\ICPMS\Method\ag10.mth	0.0400997	0.00385185
12	0_10fold		8/27/2024 1:46:57 PM		C:\Users\Public\Documents\PerkinElmer Syngistix\ICPMS\DataSet\April2024\0_10fold.857	C:\Users\Public\Documents\PerkinElmer Syngistix\ICPMS\Method\ag10.mth	0.0510318	0.00593968
13	0_10fold		8/27/2024 1:49:03 PM		C:\Users\Public\Documents\PerkinElmer Syngistix\ICPMS\DataSet\April2024\0_10fold.858	C:\Users\Public\Documents\PerkinElmer Syngistix\ICPMS\Method\ag10.mth	0.0582785	0.00252068
14	2_10fold		8/27/2024 1:51:10 PM		C:\Users\Public\Documents\PerkinElmer Syngistix\ICPMS\DataSet\April2024\2_10fold.859	C:\Users\Public\Documents\PerkinElmer Syngistix\ICPMS\Method\ag10.mth	0.0482173	0.00222622
15	2_10fold		8/27/2024 1:53:16 PM		C:\Users\Public\Documents\PerkinElmer Syngistix\ICPMS\DataSet\April2024\2_10fold.860	C:\Users\Public\Documents\PerkinElmer Syngistix\ICPMS\Method\ag10.mth	0.0378638	0.00718566
16	4_10fold		8/27/2024 1:55:22 PM		C:\Users\Public\Documents\PerkinElmer Syngistix\ICPMS\DataSet\April2024\4_10fold.861	C:\Users\Public\Documents\PerkinElmer Syngistix\ICPMS\Method\ag10.mth	0.0181085	0.00431968
17	4_10fold		8/27/2024 1:57:29 PM		C:\Users\Public\Documents\PerkinElmer Syngistix\ICPMS\DataSet\April2024\4_10fold.862	C:\Users\Public\Documents\PerkinElmer Syngistix\ICPMS\Method\ag10.mth	0.0274986	0.00483625
18	20_10fold		8/27/2024 1:59:35 PM		C:\Users\Public\Documents\PerkinElmer Syngistix\ICPMS\DataSet\April2024\20_10fold.863	C:\Users\Public\Documents\PerkinElmer Syngistix\ICPMS\Method\ag10.mth	0.0133189	0.00409433
19	20_10fold		8/27/2024 2:01:40 PM		C:\Users\Public\Documents\PerkinElmer Syngistix\ICPMS\DataSet\April2024\20_10fold.864	C:\Users\Public\Documents\PerkinElmer Syngistix\ICPMS\Method\ag10.mth	0.0131682	0.00887781
20	40_10fold		8/27/2024 2:03:46 PM		C:\Users\Public\Documents\PerkinElmer Syngistix\ICPMS\DataSet\April2024\40_10fold.865	C:\Users\Public\Documents\PerkinElmer Syngistix\ICPMS\Method\ag10.mth	0.00892915	0.00358337
21	40_10fold		8/27/2024 2:05:52 PM		C:\Users\Public\Documents\PerkinElmer Syngistix\ICPMS\DataSet\April2024\40_10fold.866	C:\Users\Public\Documents\PerkinElmer Syngistix\ICPMS\Method\ag10.mth	0.0131891	0.00398206
22	100_10fold		8/27/2024 2:07:58 PM		C:\Users\Public\Documents\PerkinElmer Syngistix\ICPMS\DataSet\April2024\100_10fold.867	C:\Users\Public\Documents\PerkinElmer Syngistix\ICPMS\Method\ag10.mth	0.00962967	0.00398383
23	100_10fold		8/27/2024 2:10:03 PM		C:\Users\Public\Documents\PerkinElmer Syngistix\ICPMS\DataSet\April2024\100_10fold.868	C:\Users\Public\Documents\PerkinElmer Syngistix\ICPMS\Method\ag10.mth	0.0109911	0.00390418
24	stock_100fold		8/27/2024 2:12:10 PM		C:\Users\Public\Documents\PerkinElmer Syngistix\ICPMS\DataSet\April2024\stock_100fold.869	C:\Users\Public\Documents\PerkinElmer Syngistix\ICPMS\Method\ag10.mth	0.00728731	0.00558145

## Sheet: Net Intensities
	Sample Id	R	Acquisition Time	QC Status	Dataset File	Method File	Ag 107 (cps)	Y 89 (IS) (cps)
1	wash		8/27/2024 1:25:05 PM		C:\Users\Public\Documents\PerkinElmer Syngistix\ICPMS\DataSet\April2024\wash.847	C:\Users\Public\Documents\PerkinElmer Syngistix\ICPMS\Method\ag10.mth	0.000166275	791155
2	wash		8/27/2024 1:27:11 PM		C:\Users\Public\Documents\PerkinElmer Syngistix\ICPMS\DataSet\April2024\wash.848	C:\Users\Public\Documents\PerkinElmer Syngistix\ICPMS\Method\ag10.mth	0.000106768	781695
3	wash		8/27/2024 1:29:18 PM		C:\Users\Public\Documents\PerkinElmer Syngistix\ICPMS\DataSet\April2024\wash.849	C:\Users\Public\Documents\PerkinElmer Syngistix\ICPMS\Method\ag10.mth	9.97076e-05	774718
4	Blank		8/27/2024 1:31:28 PM		C:\Users\Public\Documents\PerkinElmer Syngistix\ICPMS\DataSet\April2024\Blank.850	C:\Users\Public\Documents\PerkinElmer Syngistix\ICPMS\Method\ag10.mth	9.23452e-05	786811
5	50		8/27/2024 1:33:34 PM		C:\Users\Public\Documents\PerkinElmer Syngistix\ICPMS\DataSet\April2024\50.851	C:\Users\Public\Documents\PerkinElmer Syngistix\ICPMS\Method\ag10.mth	0.00931722	777629
6	20		8/27/2024 1:35:41 PM		C:\Users\Public\Documents\PerkinElmer Syngistix\ICPMS\DataSet\April2024\20.852	C:\Users\Public\Documents\PerkinElmer Syngistix\ICPMS\Method\ag10.mth	0.0251879	773594
7	5		8/27/2024 1:37:49 PM		C:\Users\Public\Documents\PerkinElmer Syngistix\ICPMS\DataSet\April2024\5.853	C:\Users\Public\Documents\PerkinElmer Syngistix\ICPMS\Method\ag10.mth	0.105779	778296
8	2		8/27/2024 1:39:55 PM		C:\Users\Public\Documents\PerkinElmer Syngistix\ICPMS\DataSet\April2024\2.854	C:\Users\Public\Documents\PerkinElmer Syngistix\ICPMS\Method\ag10.mth	0.279243	779214
9	1		8/27/2024 1:42:02 PM		C:\Users\Public\Documents\PerkinElmer Syngistix\ICPMS\DataSet\April2024\1.855	C:\Users\Public\Documents\PerkinElmer Syngistix\ICPMS\Method\ag10.mth	0.555039	780384
10	Calibration Curves		8/27/2024 1:42:02 PM
11	blank		8/27/2024 1:44:09 PM		C:\Users\Public\Documents\PerkinElmer Syngistix\ICPMS\DataSet\April2024\blank.856	C:\Users\Public\Documents\PerkinElmer Syngistix\ICPMS\Method\ag10.mth	0.000376054	774525
12	0_10fold		8/27/2024 1:46:57 PM		C:\Users\Public\Documents\PerkinElmer Syngistix\ICPMS\DataSet\April2024\0_10fold.857	C:\Users\Public\Documents\PerkinElmer Syngistix\ICPMS\Method\ag10.mth	0.000192457	776577
13	0_10fold		8/27/2024 1:49:03 PM		C:\Users\Public\Documents\PerkinElmer Syngistix\ICPMS\DataSet\April2024\0_10fold.858	C:\Users\Public\Documents\PerkinElmer Syngistix\ICPMS\Method\ag10.mth	0.000131515	775473
14	2_10fold		8/27/2024 1:51:10 PM		C:\Users\Public\Documents\PerkinElmer Syngistix\ICPMS\DataSet\April2024\2_10fold.859	C:\Users\Public\Documents\PerkinElmer Syngistix\ICPMS\Method\ag10.mth	0.000929855	771228
15	2_10fold		8/27/2024 1:53:16 PM		C:\Users\Public\Documents\PerkinElmer Syngistix\ICPMS\DataSet\April2024\2_10fold.860	C:\Users\Public\Documents\PerkinElmer Syngistix\ICPMS\Method\ag10.mth	0.00103614	775451
16	4_10fold		8/27/2024 1:55:22 PM		C:\Users\Public\Documents\PerkinElmer Syngistix\ICPMS\DataSet\April2024\4_10fold.861	C:\Users\Public\Documents\PerkinElmer Syngistix\ICPMS\Method\ag10.mth	0.00231639	766901
17	4_10fold		8/27/2024 1:57:29 PM		C:\Users\Public\Documents\PerkinElmer Syngistix\ICPMS\DataSet\April2024\4_10fold.862	C:\Users\Public\Documents\PerkinElmer Syngistix\ICPMS\Method\ag10.mth	0.00213551	770339
18	20_10fold		8/27/2024 1:59:35 PM		C:\Users\Public\Documents\PerkinElmer Syngistix\ICPMS\DataSet\April2024\20_10fold.863	C:\Users\Public\Documents\PerkinElmer Syngistix\ICPMS\Method\ag10.mth	0.00928209	765630
19	20_10fold		8/27/2024 2:01:40 PM		C:\Users\Public\Documents\PerkinElmer Syngistix\ICPMS\DataSet\April2024\20_10fold.864	C:\Users\Public\Documents\PerkinElmer Syngistix\ICPMS\Method\ag10.mth	0.0113808	778555
20	40_10fold		8/27/2024 2:03:46 PM		C:\Users\Public\Documents\PerkinElmer Syngistix\ICPMS\DataSet\April2024\40_10fold.865	C:\Users\Public\Documents\PerkinElmer Syngistix\ICPMS\Method\ag10.mth	0.018079	779233
21	40_10fold		8/27/2024 2:05:52 PM		C:\Users\Public\Documents\PerkinElmer Syngistix\ICPMS\DataSet\April2024\40_10fold.866	C:\Users\Public\Documents\PerkinElmer Syngistix\ICPMS\Method\ag10.mth	0.0188738	775631
22	100_10fold		8/27/2024 2:07:58 PM		C:\Users\Public\Documents\PerkinElmer Syngistix\ICPMS\DataSet\April2024\100_10fold.867	C:\Users\Public\Documents\PerkinElmer Syngistix\ICPMS\Method\ag10.mth	0.0449438	770545
23	100_10fold		8/27/2024 2:10:03 PM		C:\Users\Public\Documents\PerkinElmer Syngistix\ICPMS\DataSet\April2024\100_10fold.868	C:\Users\Public\Documents\PerkinElmer Syngistix\ICPMS\Method\ag10.mth	0.0443189	769131
24	stock_100fold		8/27/2024 2:12:10 PM		C:\Users\Public\Documents\PerkinElmer Syngistix\ICPMS\DataSet\April2024\stock_100fold.869	C:\Users\Public\Documents\PerkinElmer Syngistix\ICPMS\Method\ag10.mth	0.065528	727251

## Sheet: Net Intensities RSDs
	Sample Id	R	Acquisition Time	QC Status	Dataset File	Method File	Ag 107	Y 89 (IS)
1	wash		8/27/2024 1:25:05 PM		C:\Users\Public\Documents\PerkinElmer Syngistix\ICPMS\DataSet\April2024\wash.847	C:\Users\Public\Documents\PerkinElmer Syngistix\ICPMS\Method\ag10.mth	0.133452	0.00529663
2	wash		8/27/2024 1:27:11 PM		C:\Users\Public\Documents\PerkinElmer Syngistix\ICPMS\DataSet\April2024\wash.848	C:\Users\Public\Documents\PerkinElmer Syngistix\ICPMS\Method\ag10.mth	0.0704803	0.00430339
3	wash		8/27/2024 1:29:18 PM		C:\Users\Public\Documents\PerkinElmer Syngistix\ICPMS\DataSet\April2024\wash.849	C:\Users\Public\Documents\PerkinElmer Syngistix\ICPMS\Method\ag10.mth	0.13315	0.00869352
4	Blank		8/27/2024 1:31:28 PM		C:\Users\Public\Documents\PerkinElmer Syngistix\ICPMS\DataSet\April2024\Blank.850	C:\Users\Public\Documents\PerkinElmer Syngistix\ICPMS\Method\ag10.mth	0.109515	0.0088386
5	50		8/27/2024 1:33:34 PM		C:\Users\Public\Documents\PerkinElmer Syngistix\ICPMS\DataSet\April2024\50.851	C:\Users\Public\Documents\PerkinElmer Syngistix\ICPMS\Method\ag10.mth	0.00512455	0.0137795
6	20		8/27/2024 1:35:41 PM		C:\Users\Public\Documents\PerkinElmer Syngistix\ICPMS\DataSet\April2024\20.852	C:\Users\Public\Documents\PerkinElmer Syngistix\ICPMS\Method\ag10.mth	0.00777459	0.00446737
7	5		8/27/2024 1:37:49 PM		C:\Users\Public\Documents\PerkinElmer Syngistix\ICPMS\DataSet\April2024\5.853	C:\Users\Public\Documents\PerkinElmer Syngistix\ICPMS\Method\ag10.mth	0.0125162	0.00595813
8	2		8/27/2024 1:39:55 PM		C:\Users\Public\Documents\PerkinElmer Syngistix\ICPMS\DataSet\April2024\2.854	C:\Users\Public\Documents\PerkinElmer Syngistix\ICPMS\Method\ag10.mth	0.00770965	0.00463357
9	1		8/27/2024 1:42:02 PM		C:\Users\Public\Documents\PerkinElmer Syngistix\ICPMS\DataSet\April2024\1.855	C:\Users\Public\Documents\PerkinElmer Syngistix\ICPMS\Method\ag10.mth	0.00600288	0.00244325
11	blank		8/27/2024 1:44:09 PM		C:\Users\Public\Documents\PerkinElmer Syngistix\ICPMS\DataSet\April2024\blank.856	C:\Users\Public\Documents\PerkinElmer Syngistix\ICPMS\Method\ag10.mth	0.0486619	0.00385185
12	0_10fold		8/27/2024 1:46:57 PM		C:\Users\Public\Documents\PerkinElmer Syngistix\ICPMS\DataSet\April2024\0_10fold.857	C:\Users\Public\Documents\PerkinElmer Syngistix\ICPMS\Method\ag10.mth	0.071117	0.00593968
13	0_10fold		8/27/2024 1:49:03 PM		C:\Users\Public\Documents\PerkinElmer Syngistix\ICPMS\DataSet\April2024\0_10fold.858	C:\Users\Public\Documents\PerkinElmer Syngistix\ICPMS\Method\ag10.mth	0.100252	0.00252068
14	2_10fold		8/27/2024 1:51:10 PM		C:\Users\Public\Documents\PerkinElmer Syngistix\ICPMS\DataSet\April2024\2_10fold.859	C:\Users\Public\Documents\PerkinElmer Syngistix\ICPMS\Method\ag10.mth	0.0505846	0.00222622
15	2_10fold		8/27/2024 1:53:16 PM		C:\Users\Public\Documents\PerkinElmer Syngistix\ICPMS\DataSet\April2024\2_10fold.860	C:\Users\Public\Documents\PerkinElmer Syngistix\ICPMS\Method\ag10.mth	0.03488	0.00718566
16	4_10fold		8/27/2024 1:55:22 PM		C:\Users\Public\Documents\PerkinElmer Syngistix\ICPMS\DataSet\April2024\4_10fold.861	C:\Users\Public\Documents\PerkinElmer Syngistix\ICPMS\Method\ag10.mth	0.0161595	0.00431968
17	4_10fold		8/27/2024 1:57:29 PM		C:\Users\Public\Documents\PerkinElmer Syngistix\ICPMS\DataSet\April2024\4_10fold.862	C:\Users\Public\Documents\PerkinElmer Syngistix\ICPMS\Method\ag10.mth	0.027751	0.00483625
18	20_10fold		8/27/2024 1:59:35 PM		C:\Users\Public\Documents\PerkinElmer Syngistix\ICPMS\DataSet\April2024\20_10fold.863	C:\Users\Public\Documents\PerkinElmer Syngistix\ICPMS\Method\ag10.mth	0.0139716	0.00409433
19	20_10fold		8/27/2024 2:01:40 PM		C:\Users\Public\Documents\PerkinElmer Syngistix\ICPMS\DataSet\April2024\20_10fold.864	C:\Users\Public\Documents\PerkinElmer Syngistix\ICPMS\Method\ag10.mth	0.015705	0.00887781
20	40_10fold		8/27/2024 2:03:46 PM		C:\Users\Public\Documents\PerkinElmer Syngistix\ICPMS\DataSet\April2024\40_10fold.865	C:\Users\Public\Documents\PerkinElmer Syngistix\ICPMS\Method\ag10.mth	0.00719347	0.00358337
21	40_10fold		8/27/2024 2:05:52 PM		C:\Users\Public\Documents\PerkinElmer Syngistix\ICPMS\DataSet\April2024\40_10fold.866	C:\Users\Public\Documents\PerkinElmer Syngistix\ICPMS\Method\ag10.mth	0.0101486	0.00398206
22	100_10fold		8/27/2024 2:07:58 PM		C:\Users\Public\Documents\PerkinElmer Syngistix\ICPMS\DataSet\April2024\100_10fold.867	C:\Users\Public\Documents\PerkinElmer Syngistix\ICPMS\Method\ag10.mth	0.00767554	0.00398383
23	100_10fold		8/27/2024 2:10:03 PM		C:\Users\Public\Documents\PerkinElmer Syngistix\ICPMS\DataSet\April2024\100_10fold.868	C:\Users\Public\Documents\PerkinElmer Syngistix\ICPMS\Method\ag10.mth	0.0110622	0.00390418
24	stock_100fold		8/27/2024 2:12:10 PM		C:\Users\Public\Documents\PerkinElmer Syngistix\ICPMS\DataSet\April2024\stock_100fold.869	C:\Users\Public\Documents\PerkinElmer Syngistix\ICPMS\Method\ag10.mth	0.00845112	0.00558145

## Sheet: Concentrations
	Sample Id	R	Acquisition Time	QC Status	Dataset File	Method File	Ag 107 (ppb)	Y 89 (IS)
1	wash		8/27/2024 1:25:05 PM		C:\Users\Public\Documents\PerkinElmer Syngistix\ICPMS\DataSet\April2024\wash.847	C:\Users\Public\Documents\PerkinElmer Syngistix\ICPMS\Method\ag10.mth
2	wash		8/27/2024 1:27:11 PM		C:\Users\Public\Documents\PerkinElmer Syngistix\ICPMS\DataSet\April2024\wash.848	C:\Users\Public\Documents\PerkinElmer Syngistix\ICPMS\Method\ag10.mth
3	wash		8/27/2024 1:29:18 PM		C:\Users\Public\Documents\PerkinElmer Syngistix\ICPMS\DataSet\April2024\wash.849	C:\Users\Public\Documents\PerkinElmer Syngistix\ICPMS\Method\ag10.mth
4	Blank		8/27/2024 1:31:28 PM		C:\Users\Public\Documents\PerkinElmer Syngistix\ICPMS\DataSet\April2024\Blank.850	C:\Users\Public\Documents\PerkinElmer Syngistix\ICPMS\Method\ag10.mth		1
5	50		8/27/2024 1:33:34 PM		C:\Users\Public\Documents\PerkinElmer Syngistix\ICPMS\DataSet\April2024\50.851	C:\Users\Public\Documents\PerkinElmer Syngistix\ICPMS\Method\ag10.mth	0.2	0.98833
6	20		8/27/2024 1:35:41 PM		C:\Users\Public\Documents\PerkinElmer Syngistix\ICPMS\DataSet\April2024\20.852	C:\Users\Public\Documents\PerkinElmer Syngistix\ICPMS\Method\ag10.mth	0.505242	0.983202
7	5		8/27/2024 1:37:49 PM		C:\Users\Public\Documents\PerkinElmer Syngistix\ICPMS\DataSet\April2024\5.853	C:\Users\Public\Documents\PerkinElmer Syngistix\ICPMS\Method\ag10.mth	2.00779	0.989177
8	2		8/27/2024 1:39:55 PM		C:\Users\Public\Documents\PerkinElmer Syngistix\ICPMS\DataSet\April2024\2.854	C:\Users\Public\Documents\PerkinElmer Syngistix\ICPMS\Method\ag10.mth	5.04184	0.990345
9	1		8/27/2024 1:42:02 PM		C:\Users\Public\Documents\PerkinElmer Syngistix\ICPMS\DataSet\April2024\1.855	C:\Users\Public\Documents\PerkinElmer Syngistix\ICPMS\Method\ag10.mth	10.0048	0.991831
10	Calibration Curves		8/27/2024 1:42:02 PM
11	blank		8/27/2024 1:44:09 PM		C:\Users\Public\Documents\PerkinElmer Syngistix\ICPMS\DataSet\April2024\blank.856	C:\Users\Public\Documents\PerkinElmer Syngistix\ICPMS\Method\ag10.mth	0.00677856	0.984385
12	0_10fold		8/27/2024 1:46:57 PM		C:\Users\Public\Documents\PerkinElmer Syngistix\ICPMS\DataSet\April2024\0_10fold.857	C:\Users\Public\Documents\PerkinElmer Syngistix\ICPMS\Method\ag10.mth	0.00346914	0.986993	0.00291989	blank
13	0_10fold		8/27/2024 1:49:03 PM		C:\Users\Public\Documents\PerkinElmer Syngistix\ICPMS\DataSet\April2024\0_10fold.858	C:\Users\Public\Documents\PerkinElmer Syngistix\ICPMS\Method\ag10.mth	0.00237063	0.985589
14	2_10fold		8/27/2024 1:51:10 PM		C:\Users\Public\Documents\PerkinElmer Syngistix\ICPMS\DataSet\April2024\2_10fold.859	C:\Users\Public\Documents\PerkinElmer Syngistix\ICPMS\Method\ag10.mth	0.0167611	0.980195	0.017719
15	2_10fold		8/27/2024 1:53:16 PM		C:\Users\Public\Documents\PerkinElmer Syngistix\ICPMS\DataSet\April2024\2_10fold.860	C:\Users\Public\Documents\PerkinElmer Syngistix\ICPMS\Method\ag10.mth	0.018677	0.985562
16	4_10fold		8/27/2024 1:55:22 PM		C:\Users\Public\Documents\PerkinElmer Syngistix\ICPMS\DataSet\April2024\4_10fold.861	C:\Users\Public\Documents\PerkinElmer Syngistix\ICPMS\Method\ag10.mth	0.0417541	0.974695	0.0401239
17	4_10fold		8/27/2024 1:57:29 PM		C:\Users\Public\Documents\PerkinElmer Syngistix\ICPMS\DataSet\April2024\4_10fold.862	C:\Users\Public\Documents\PerkinElmer Syngistix\ICPMS\Method\ag10.mth	0.0384937	0.979064
18	20_10fold		8/27/2024 1:59:35 PM		C:\Users\Public\Documents\PerkinElmer Syngistix\ICPMS\DataSet\April2024\20_10fold.863	C:\Users\Public\Documents\PerkinElmer Syngistix\ICPMS\Method\ag10.mth	0.167314	0.97308	0.18623
19	20_10fold		8/27/2024 2:01:40 PM		C:\Users\Public\Documents\PerkinElmer Syngistix\ICPMS\DataSet\April2024\20_10fold.864	C:\Users\Public\Documents\PerkinElmer Syngistix\ICPMS\Method\ag10.mth	0.205145	0.989507
20	40_10fold		8/27/2024 2:03:46 PM		C:\Users\Public\Documents\PerkinElmer Syngistix\ICPMS\DataSet\April2024\40_10fold.865	C:\Users\Public\Documents\PerkinElmer Syngistix\ICPMS\Method\ag10.mth	0.325883	0.990368	0.333046
21	40_10fold		8/27/2024 2:05:52 PM		C:\Users\Public\Documents\PerkinElmer Syngistix\ICPMS\DataSet\April2024\40_10fold.866	C:\Users\Public\Documents\PerkinElmer Syngistix\ICPMS\Method\ag10.mth	0.340209	0.98579
22	100_10fold		8/27/2024 2:07:58 PM		C:\Users\Public\Documents\PerkinElmer Syngistix\ICPMS\DataSet\April2024\100_10fold.867	C:\Users\Public\Documents\PerkinElmer Syngistix\ICPMS\Method\ag10.mth	0.810135	0.979326	0.804503
23	100_10fold		8/27/2024 2:10:03 PM		C:\Users\Public\Documents\PerkinElmer Syngistix\ICPMS\DataSet\April2024\100_10fold.868	C:\Users\Public\Documents\PerkinElmer Syngistix\ICPMS\Method\ag10.mth	0.798871	0.977529
24	stock_100fold		8/27/2024 2:12:10 PM		C:\Users\Public\Documents\PerkinElmer Syngistix\ICPMS\DataSet\April2024\stock_100fold.869	C:\Users\Public\Documents\PerkinElmer Syngistix\ICPMS\Method\ag10.mth	1.18118	0.924302
			stock mg/ml	ppm	ppb	10 fold diluted stock
			0.02	20	20000	2000
			expected	diluted	sample volume ml	added digestion	dilution through digestion	total dilution factor	measured concetration	adjusted per dilution	yield extraction
			100ppb	100	0.4	0.75	2.875	28.75	0.804503	23.1295	23.1295
			40ppb	40	0.4	0.75	2.875	28.75	0.333046	9.57508	23.9377
			20ppb	20	0.4	0.75	2.875	28.75	0.18623	5.35411	26.7705
			4ppb	4	0.4	0.75	2.875	28.75	0.0401239	1.15356	28.8391
			2ppb	2	0.4	0.75	2.875	28.75	0.017719	0.509422	25.4711
			diluted stock	concentration ppb
			2000ppb	2000	0.334	0.75	3.24551	324.551	1.181	383.295	19.1647

## Sheet: Concentrations RSDs
	Sample Id	R	Acquisition Time	QC Status	Dataset File	Method File	Ag 107	Y 89 (IS)
1	wash		8/27/2024 1:25:05 PM		C:\Users\Public\Documents\PerkinElmer Syngistix\ICPMS\DataSet\April2024\wash.847	C:\Users\Public\Documents\PerkinElmer Syngistix\ICPMS\Method\ag10.mth
2	wash		8/27/2024 1:27:11 PM		C:\Users\Public\Documents\PerkinElmer Syngistix\ICPMS\DataSet\April2024\wash.848	C:\Users\Public\Documents\PerkinElmer Syngistix\ICPMS\Method\ag10.mth
3	wash		8/27/2024 1:29:18 PM		C:\Users\Public\Documents\PerkinElmer Syngistix\ICPMS\DataSet\April2024\wash.849	C:\Users\Public\Documents\PerkinElmer Syngistix\ICPMS\Method\ag10.mth
4	Blank		8/27/2024 1:31:28 PM		C:\Users\Public\Documents\PerkinElmer Syngistix\ICPMS\DataSet\April2024\Blank.850	C:\Users\Public\Documents\PerkinElmer Syngistix\ICPMS\Method\ag10.mth		0.0088386
5	50		8/27/2024 1:33:34 PM		C:\Users\Public\Documents\PerkinElmer Syngistix\ICPMS\DataSet\April2024\50.851	C:\Users\Public\Documents\PerkinElmer Syngistix\ICPMS\Method\ag10.mth	0.00512455	0.0137795
6	20		8/27/2024 1:35:41 PM		C:\Users\Public\Documents\PerkinElmer Syngistix\ICPMS\DataSet\April2024\20.852	C:\Users\Public\Documents\PerkinElmer Syngistix\ICPMS\Method\ag10.mth	0.00777459	0.00446737
7	5		8/27/2024 1:37:49 PM		C:\Users\Public\Documents\PerkinElmer Syngistix\ICPMS\DataSet\April2024\5.853	C:\Users\Public\Documents\PerkinElmer Syngistix\ICPMS\Method\ag10.mth	0.0125162	0.00595813
8	2		8/27/2024 1:39:55 PM		C:\Users\Public\Documents\PerkinElmer Syngistix\ICPMS\DataSet\April2024\2.854	C:\Users\Public\Documents\PerkinElmer Syngistix\ICPMS\Method\ag10.mth	0.00770965	0.00463357
9	1		8/27/2024 1:42:02 PM		C:\Users\Public\Documents\PerkinElmer Syngistix\ICPMS\DataSet\April2024\1.855	C:\Users\Public\Documents\PerkinElmer Syngistix\ICPMS\Method\ag10.mth	0.00600288	0.00244325
11	blank		8/27/2024 1:44:09 PM		C:\Users\Public\Documents\PerkinElmer Syngistix\ICPMS\DataSet\April2024\blank.856	C:\Users\Public\Documents\PerkinElmer Syngistix\ICPMS\Method\ag10.mth	0.0486619	0.00385185
12	0_10fold		8/27/2024 1:46:57 PM		C:\Users\Public\Documents\PerkinElmer Syngistix\ICPMS\DataSet\April2024\0_10fold.857	C:\Users\Public\Documents\PerkinElmer Syngistix\ICPMS\Method\ag10.mth	0.071117	0.00593968
13	0_10fold		8/27/2024 1:49:03 PM		C:\Users\Public\Documents\PerkinElmer Syngistix\ICPMS\DataSet\April2024\0_10fold.858	C:\Users\Public\Documents\PerkinElmer Syngistix\ICPMS\Method\ag10.mth	0.100252	0.00252068
14	2_10fold		8/27/2024 1:51:10 PM		C:\Users\Public\Documents\PerkinElmer Syngistix\ICPMS\DataSet\April2024\2_10fold.859	C:\Users\Public\Documents\PerkinElmer Syngistix\ICPMS\Method\ag10.mth	0.0505846	0.00222622
15	2_10fold		8/27/2024 1:53:16 PM		C:\Users\Public\Documents\PerkinElmer Syngistix\ICPMS\DataSet\April2024\2_10fold.860	C:\Users\Public\Documents\PerkinElmer Syngistix\ICPMS\Method\ag10.mth	0.03488	0.00718566
16	4_10fold		8/27/2024 1:55:22 PM		C:\Users\Public\Documents\PerkinElmer Syngistix\ICPMS\DataSet\April2024\4_10fold.861	C:\Users\Public\Documents\PerkinElmer Syngistix\ICPMS\Method\ag10.mth	0.0161595	0.00431968
17	4_10fold		8/27/2024 1:57:29 PM		C:\Users\Public\Documents\PerkinElmer Syngistix\ICPMS\DataSet\April2024\4_10fold.862	C:\Users\Public\Documents\PerkinElmer Syngistix\ICPMS\Method\ag10.mth	0.027751	0.00483625
18	20_10fold		8/27/2024 1:59:35 PM		C:\Users\Public\Documents\PerkinElmer Syngistix\ICPMS\DataSet\April2024\20_10fold.863	C:\Users\Public\Documents\PerkinElmer Syngistix\ICPMS\Method\ag10.mth	0.0139716	0.00409433
19	20_10fold		8/27/2024 2:01:40 PM		C:\Users\Public\Documents\PerkinElmer Syngistix\ICPMS\DataSet\April2024\20_10fold.864	C:\Users\Public\Documents\PerkinElmer Syngistix\ICPMS\Method\ag10.mth	0.015705	0.00887781
20	40_10fold		8/27/2024 2:03:46 PM		C:\Users\Public\Documents\PerkinElmer Syngistix\ICPMS\DataSet\April2024\40_10fold.865	C:\Users\Public\Documents\PerkinElmer Syngistix\ICPMS\Method\ag10.mth	0.00719347	0.00358337
21	40_10fold		8/27/2024 2:05:52 PM		C:\Users\Public\Documents\PerkinElmer Syngistix\ICPMS\DataSet\April2024\40_10fold.866	C:\Users\Public\Documents\PerkinElmer Syngistix\ICPMS\Method\ag10.mth	0.0101486	0.00398206
22	100_10fold		8/27/2024 2:07:58 PM		C:\Users\Public\Documents\PerkinElmer Syngistix\ICPMS\DataSet\April2024\100_10fold.867	C:\Users\Public\Documents\PerkinElmer Syngistix\ICPMS\Method\ag10.mth	0.00767554	0.00398383
23	100_10fold		8/27/2024 2:10:03 PM		C:\Users\Public\Documents\PerkinElmer Syngistix\ICPMS\DataSet\April2024\100_10fold.868	C:\Users\Public\Documents\PerkinElmer Syngistix\ICPMS\Method\ag10.mth	0.0110622	0.00390418
24	stock_100fold		8/27/2024 2:12:10 PM		C:\Users\Public\Documents\PerkinElmer Syngistix\ICPMS\DataSet\April2024\stock_100fold.869	C:\Users\Public\Documents\PerkinElmer Syngistix\ICPMS\Method\ag10.mth	0.00845112	0.00558145

## Sheet: Unfactored Concentrations
	Sample Id	R	Acquisition Time	QC Status	Dataset File	Method File	Ag 107 (ppb)	Y 89 (IS)
1	wash		8/27/2024 1:25:05 PM		C:\Users\Public\Documents\PerkinElmer Syngistix\ICPMS\DataSet\April2024\wash.847	C:\Users\Public\Documents\PerkinElmer Syngistix\ICPMS\Method\ag10.mth
2	wash		8/27/2024 1:27:11 PM		C:\Users\Public\Documents\PerkinElmer Syngistix\ICPMS\DataSet\April2024\wash.848	C:\Users\Public\Documents\PerkinElmer Syngistix\ICPMS\Method\ag10.mth
3	wash		8/27/2024 1:29:18 PM		C:\Users\Public\Documents\PerkinElmer Syngistix\ICPMS\DataSet\April2024\wash.849	C:\Users\Public\Documents\PerkinElmer Syngistix\ICPMS\Method\ag10.mth
4	Blank		8/27/2024 1:31:28 PM		C:\Users\Public\Documents\PerkinElmer Syngistix\ICPMS\DataSet\April2024\Blank.850	C:\Users\Public\Documents\PerkinElmer Syngistix\ICPMS\Method\ag10.mth
5	50		8/27/2024 1:33:34 PM		C:\Users\Public\Documents\PerkinElmer Syngistix\ICPMS\DataSet\April2024\50.851	C:\Users\Public\Documents\PerkinElmer Syngistix\ICPMS\Method\ag10.mth	0.2
6	20		8/27/2024 1:35:41 PM		C:\Users\Public\Documents\PerkinElmer Syngistix\ICPMS\DataSet\April2024\20.852	C:\Users\Public\Documents\PerkinElmer Syngistix\ICPMS\Method\ag10.mth	0.505242
7	5		8/27/2024 1:37:49 PM		C:\Users\Public\Documents\PerkinElmer Syngistix\ICPMS\DataSet\April2024\5.853	C:\Users\Public\Documents\PerkinElmer Syngistix\ICPMS\Method\ag10.mth	2.00779
8	2		8/27/2024 1:39:55 PM		C:\Users\Public\Documents\PerkinElmer Syngistix\ICPMS\DataSet\April2024\2.854	C:\Users\Public\Documents\PerkinElmer Syngistix\ICPMS\Method\ag10.mth	5.04184
9	1		8/27/2024 1:42:02 PM		C:\Users\Public\Documents\PerkinElmer Syngistix\ICPMS\DataSet\April2024\1.855	C:\Users\Public\Documents\PerkinElmer Syngistix\ICPMS\Method\ag10.mth	10.0048
10	Calibration Curves		8/27/2024 1:42:02 PM
11	blank		8/27/2024 1:44:09 PM		C:\Users\Public\Documents\PerkinElmer Syngistix\ICPMS\DataSet\April2024\blank.856	C:\Users\Public\Documents\PerkinElmer Syngistix\ICPMS\Method\ag10.mth	0.00677856
12	0_10fold		8/27/2024 1:46:57 PM		C:\Users\Public\Documents\PerkinElmer Syngistix\ICPMS\DataSet\April2024\0_10fold.857	C:\Users\Public\Documents\PerkinElmer Syngistix\ICPMS\Method\ag10.mth	0.00346914
13	0_10fold		8/27/2024 1:49:03 PM		C:\Users\Public\Documents\PerkinElmer Syngistix\ICPMS\DataSet\April2024\0_10fold.858	C:\Users\Public\Documents\PerkinElmer Syngistix\ICPMS\Method\ag10.mth	0.00237063
14	2_10fold		8/27/2024 1:51:10 PM		C:\Users\Public\Documents\PerkinElmer Syngistix\ICPMS\DataSet\April2024\2_10fold.859	C:\Users\Public\Documents\PerkinElmer Syngistix\ICPMS\Method\ag10.mth	0.0167611
15	2_10fold		8/27/2024 1:53:16 PM		C:\Users\Public\Documents\PerkinElmer Syngistix\ICPMS\DataSet\April2024\2_10fold.860	C:\Users\Public\Documents\PerkinElmer Syngistix\ICPMS\Method\ag10.mth	0.018677
16	4_10fold		8/27/2024 1:55:22 PM		C:\Users\Public\Documents\PerkinElmer Syngistix\ICPMS\DataSet\April2024\4_10fold.861	C:\Users\Public\Documents\PerkinElmer Syngistix\ICPMS\Method\ag10.mth	0.0417541
17	4_10fold		8/27/2024 1:57:29 PM		C:\Users\Public\Documents\PerkinElmer Syngistix\ICPMS\DataSet\April2024\4_10fold.862	C:\Users\Public\Documents\PerkinElmer Syngistix\ICPMS\Method\ag10.mth	0.0384937
18	20_10fold		8/27/2024 1:59:35 PM		C:\Users\Public\Documents\PerkinElmer Syngistix\ICPMS\DataSet\April2024\20_10fold.863	C:\Users\Public\Documents\PerkinElmer Syngistix\ICPMS\Method\ag10.mth	0.167314
19	20_10fold		8/27/2024 2:01:40 PM		C:\Users\Public\Documents\PerkinElmer Syngistix\ICPMS\DataSet\April2024\20_10fold.864	C:\Users\Public\Documents\PerkinElmer Syngistix\ICPMS\Method\ag10.mth	0.205145
20	40_10fold		8/27/2024 2:03:46 PM		C:\Users\Public\Documents\PerkinElmer Syngistix\ICPMS\DataSet\April2024\40_10fold.865	C:\Users\Public\Documents\PerkinElmer Syngistix\ICPMS\Method\ag10.mth	0.325883
21	40_10fold		8/27/2024 2:05:52 PM		C:\Users\Public\Documents\PerkinElmer Syngistix\ICPMS\DataSet\April2024\40_10fold.866	C:\Users\Public\Documents\PerkinElmer Syngistix\ICPMS\Method\ag10.mth	0.340209
22	100_10fold		8/27/2024 2:07:58 PM		C:\Users\Public\Documents\PerkinElmer Syngistix\ICPMS\DataSet\April2024\100_10fold.867	C:\Users\Public\Documents\PerkinElmer Syngistix\ICPMS\Method\ag10.mth	0.810135
23	100_10fold		8/27/2024 2:10:03 PM		C:\Users\Public\Documents\PerkinElmer Syngistix\ICPMS\DataSet\April2024\100_10fold.868	C:\Users\Public\Documents\PerkinElmer Syngistix\ICPMS\Method\ag10.mth	0.798871
24	stock_100fold		8/27/2024 2:12:10 PM		C:\Users\Public\Documents\PerkinElmer Syngistix\ICPMS\DataSet\April2024\stock_100fold.869	C:\Users\Public\Documents\PerkinElmer Syngistix\ICPMS\Method\ag10.mth	1.18118

## Sheet: Internal Standards
Row Index Number	Y 89
1
2
3
4	1
5	0.98833
6	0.983202
7	0.989177
8	0.990345
9	0.991831
11	0.984385
12	0.986993
13	0.985589
14	0.980195
15	0.985562
16	0.974695
17	0.979064
18	0.97308
19	0.989507
20	0.990368
21	0.98579
22	0.979326
23	0.977529
24	0.924302
